# Supplementary material
Source: PubMed Central journal article supplement (PMC3406659)
Supplement: supp_M112.361360_jbc.M112.361360-1.pdf [file supp_M112.361360_jbc.M112.361360-1.pdf]

## Supplemental Figures

### Kruppel-like factor 4 contributes to high phosphate-induced phenotypic switching of vascular smooth muscle cells into osteogenic cells

Tadashi Yoshida, Maho Yamashita, and Matsuhiko Hayashi

Apheresis and Dialysis Center, School of Medicine, Keio University, Tokyo, Japan

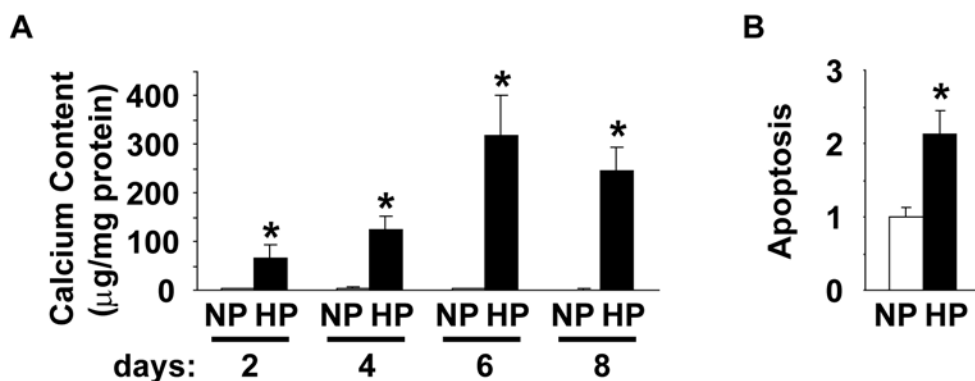

**Supplemental Figure I.** High phosphate concentration induced calcium deposition and apoptosis in cultured SMCs. A: Rat aortic SMCs were cultured with normal (NP) or high (HP) phosphate concentration for 2, 4, 6, and 8 days. Calcium deposition was measured and normalized by cellular protein content. B: SMCs were incubated with normal (NP) or high (HP) phosphate concentration for 24 hours. A quantitative index of apoptosis, determined by ELISA, is presented as the relative value to that with normal phosphate. Values represent the means  $\pm$  SEM. \* $P < 0.05$  compared to SMCs with normal phosphate medium ( $n=3$ ).

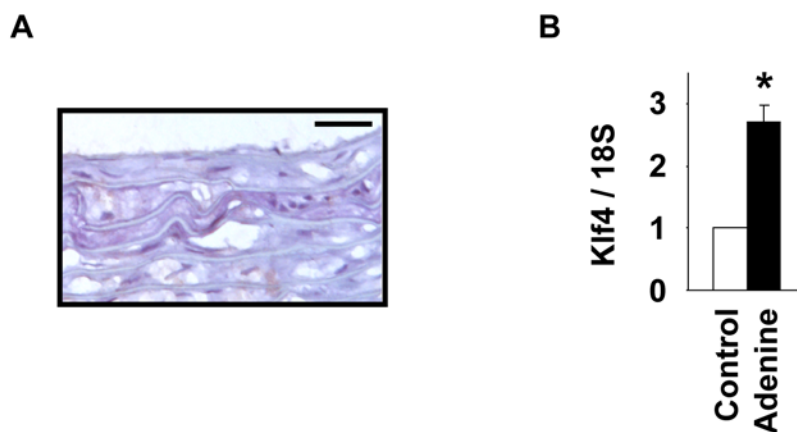

**Supplemental Figure II.** Klf4 was induced in the aorta of adenine-induced uremic rats. A: Negative IgG control for Figure 3H. Immunohistochemical staining was performed in the aorta of adenine-induced uremic rats using rabbit IgG, instead of anti-Klf4 antibody. Bar: 50  $\mu$ m. B: *Klf4* mRNA expression in the aorta of adenine-induced uremic rats and controls was determined by real-time RT-PCR. Values represent the means  $\pm$  SEM. \* $P < 0.05$  compared to controls ( $n=4$ ).

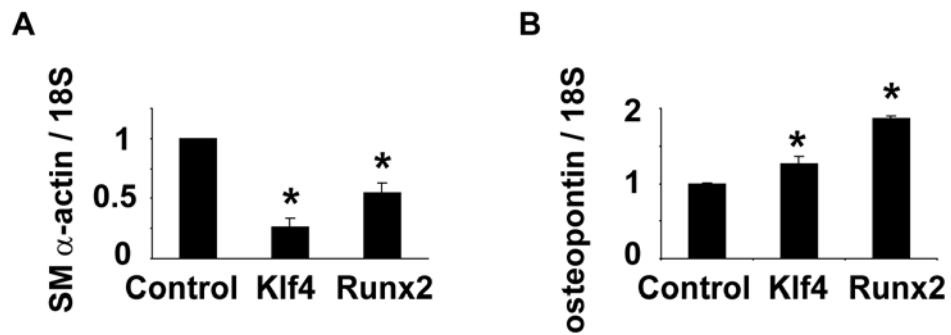

**Supplemental Figure III.** Klf4 and Runx2 decreased *SM  $\alpha$ -actin* expression, whereas they increased *osteopontin* expression. Rat aortic SMCs were transfected with the expression construct for Klf4 or Runx2, and expression of *SM  $\alpha$ -actin* (A) and *osteopontin* (B) was determined by real-time RT-PCR. Values represent the means  $\pm$  SEM. \* $P < 0.05$  compared to controls (n=3).
